# Supplementary material for: Comparative study of large cell neuroendocrine carcinoma and small cell lung carcinoma in high-grade neuroendocrine tumors of the lung: a large population-based study
Source: PubMed Central journal article supplement (PMC6691699; doi:10.7150/jca.33367), 2019-07-10
Supplement: jcav10p4226s1.pdf [file jcav10p4226s1.pdf]

**Supplementary Table 1. Univariate Cox proportional hazards regression model analysis of overall survival and cancer-special survival in high-grade LCNEC and SCLC patients**

|                          | Overall survival |         | Cancer-special survival |         |
|--------------------------|------------------|---------|-------------------------|---------|
|                          | HR (95% CI)      | P value | HR (95% CI)             | P value |
| <b>Age</b>               |                  |         |                         |         |
| <60                      | Reference        | —       | Reference               | —       |
| 60-79                    | 1.18 (1.14-1.23) | <0.001  | 1.16 (1.11-1.21)        | <0.001  |
| ≥80                      | 1.59 (1.53-1.65) | <0.001  | 1.52 (1.46-1.58)        | <0.001  |
| <b>Sex</b>               |                  |         |                         |         |
| Female                   | Reference        | —       | Reference               | —       |
| Male                     | 1.15 (1.11-1.18) | <0.001  | 1.14 (1.10-1.17)        | <0.001  |
| <b>Race</b>              |                  |         |                         |         |
| White                    | Reference        | —       | Reference               | —       |
| Black                    | 0.98 (0.93-1.03) | 0.492   | 0.98 (0.93-1.03)        | 0.433   |
| Others <sup>a</sup>      | 0.98 (0.90-1.06) | 0.541   | 0.94 (0.86-1.02)        | 0.152   |
| Unknown                  | 1.00 (0.58-1.73) | 0.993   | 0.99 (0.56-1.74)        | 0.973   |
| <b>Marital status</b>    |                  |         |                         |         |
| Married                  | Reference        | —       | Reference               | —       |
| Not married <sup>b</sup> | 1.13 (1.10-1.16) | <0.001  | 1.11 (1.07-1.14)        | <0.001  |
| Unknown                  | 1.14 (1.05-1.25) | 0.002   | 1.13 (1.04-1.24)        | 0.006   |
| <b>Laterality</b>        |                  |         |                         |         |
| Left                     | Reference        | —       | Reference               | —       |
| Right                    | 1.00 (0.97-1.03) | 0.818   | 1.00 (0.97-1.04)        | 0.780   |
| Bilateral                | 1.67 (1.44-1.93) | <0.001  | 1.74 (1.50-2.02)        | <0.001  |
| Unknown                  | 1.21 (1.12-1.31) | <0.001  | 1.20 (1.10-1.31)        | <0.001  |
| <b>SEER stage</b>        |                  |         |                         |         |
| Localized                | Reference        | —       | Reference               | —       |
| Regional                 | 1.44 (1.35-1.54) | <0.001  | 1.58 (1.47-1.70)        | <0.001  |
| Distant                  | 2.90 (2.72-3.09) | <0.001  | 3.30 (3.08-3.54)        | <0.001  |
| Unknown                  | 1.98 (1.77-2.22) | <0.001  | 2.22 (1.97-2.50)        | <0.001  |
| <b>Tumor size (cm)</b>   |                  |         |                         |         |
| ≤3                       | Reference        | —       | Reference               | —       |
| 3-5                      | 1.26 (1.20-1.32) | <0.001  | 1.29 (1.22-1.36)        | <0.001  |
| 5-7                      | 1.35 (1.27-1.42) | <0.001  | 1.39 (1.31-1.47)        | <0.001  |
| >7                       | 1.46 (1.39-1.54) | <0.001  | 1.51 (1.43-1.60)        | <0.001  |
| Unknown                  | 1.69 (1.62-1.76) | <0.001  | 1.76 (1.69-1.84)        | <0.001  |
| <b>Nodal status</b>      |                  |         |                         |         |
| No                       | Reference        | —       | Reference               | —       |
| Yes                      | 1.51 (1.45-1.57) | <0.001  | 1.58 (1.52-1.65)        | <0.001  |

|                          |                  |        |                  |        |
|--------------------------|------------------|--------|------------------|--------|
| Unknown                  | 1.70 (1.61-1.80) | <0.001 | 1.80 (1.69-1.90) | <0.001 |
| <b>Surgery</b>           |                  |        |                  |        |
| No                       | Reference        | —      | Reference        | —      |
| Yes                      | 0.35 (0.33-0.38) | <0.001 | 0.32 (0.30-0.35) | <0.001 |
| Unknown                  | 0.93 (0.79-1.09) | 0.361  | 0.89 (0.75-1.06) | 0.186  |
| <b>Radiation</b>         |                  |        |                  |        |
| No/ Unknown              | Reference        | —      | Reference        | —      |
| Yes                      | 0.59 (0.58-0.61) | <0.001 | 0.60 (0.58-0.62) | <0.001 |
| <b>Chemotherapy</b>      |                  |        |                  |        |
| No/ Unknown              | Reference        | —      | Reference        | —      |
| Yes                      | 0.49 (0.47-0.50) | <0.001 | 0.49 (0.48-0.51) | <0.001 |
| <b>Histological type</b> |                  |        |                  |        |
| LCNEC                    | Reference        | —      | Reference        | —      |
| SCLC                     | 1.86 (1.74-1.99) | <0.001 | 1.95 (1.82-2.10) | <0.001 |

Abbreviations: LCNEC, large cell neuroendocrine carcinoma; SCLC, small cell lung carcinoma; SEER, Surveillance Epidemiology and End Results database; HR, hazard ratio; CI, confidence interval.

<sup>a</sup> Others included American Indian/Alaskan native, and Asian/Pacific islander.

<sup>b</sup> Not married included separated, single (never married), divorced, unmarried or domestic partner and widowed.

**Supplementary Figure 1. OS and CSS for the high-grade LCNEC and SCLC patients in the non-surgery subgroup using Kaplan-Meier analysis and log-rank test.** (A) OS in subgroup treated without surgery: LCNEC vs. SCLC,  $P = 0.16$ ; (B) CSS in subgroup treated without surgery: LCNEC vs. SCLC,  $P = 0.06$ . Abbreviations: LCNEC, large cell neuroendocrine carcinoma; SCLC, small cell lung carcinoma; OS, overall survival; CSS, cancer-specific survival.

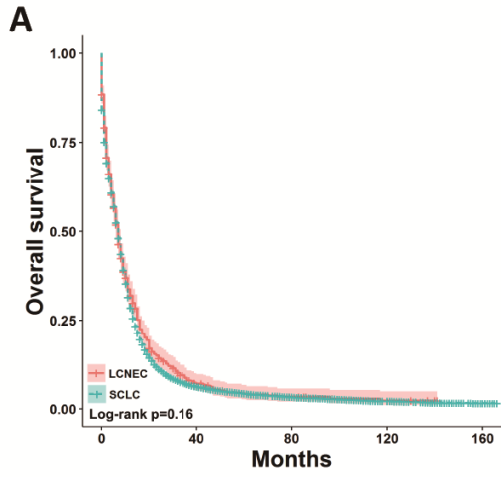

| OS    | 1-year | 2-year | 3-year |
|-------|--------|--------|--------|
| LCNEC | 31.9%  | 14.3%  | 8.1%   |
| SCLC  | 28.5%  | 11.3%  | 7.0%   |

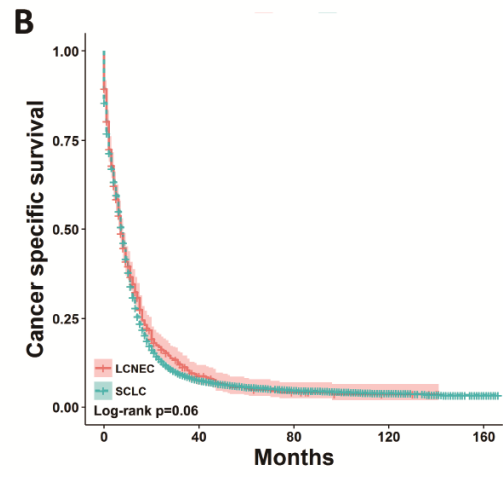

| CSS   | 1-year | 2-year | 3-year |
|-------|--------|--------|--------|
| LCNEC | 34.6%  | 16.1%  | 9.5%   |
| SCLC  | 30.9%  | 12.8%  | 8.3%   |
